# Supplementary material for: Comprehensive Evaluation of Amino Acids and Polyphenols in 69 Varieties of Green Cabbage (Brassica oleracea L. var. capitata L.) Based on Multivariate Statistical Analysis
Source: MDPI journal article supplement (doi:10.3390/molecules26175355), 2021-09-03
Supplement: s1 [file s1]

## Article

# Comprehensive evaluation of amino acids and polyphenols in 69 varieties of green cabbage (*Brassica oleracea* L. var. *capitata* L.) based on multivariate statistical analysis

Ning Jin <sup>1</sup>, Li Jin <sup>1</sup>, Shilei Luo <sup>1</sup>, Zhongqi Tang <sup>1</sup>, Zeci Liu <sup>1</sup>, Shouhui Wei <sup>1</sup>, Fanhong Liu <sup>1</sup>, Xiaoqiang Zhao <sup>2</sup>, Jihua Yu <sup>1,2,\*</sup> and Yuan Zhong <sup>2,\*</sup>

<sup>1</sup> College of Horticulture, Gansu Agricultural University, Lanzhou 730070, China; Jinn0513@163.com (N.J.); jinli0124@163.com (L.J.); Luosl1021@163.com (S.L.); tangzq@gsau.edu.cn (Z.T.); liuzc@gsau.edu.cn (Z.L.); wlj920229@163.com (S.W.); Liufh3962@163.com (F.L.)

<sup>2</sup> Gansu Provincial Key Laboratory of Aridland Crop Science, Gansu Agricultural University, Lanzhou 730070, China; zhaoxq3324@163.com (X.Z.)

\* Correspondence: yujihua@gsau.edu.cn (J.Y.); zhongy@gsau.edu.cn (Y.Z.)

**Table S1.** Contents of 19 free amino acids and total free amino acids (mg/g dry matter) in 69 varieties of cabbage.

| Varieties | Thr      | Phe      | Trp      | Leu       | Ile        | Asn       | Met       | Tyr        | Val       | Pro        | Ala      | Gly      | Ser        | His     | Glu     | Asp        | Arg       | Gln       | Lys       | Total    |
|-----------|----------|----------|----------|-----------|------------|-----------|-----------|------------|-----------|------------|----------|----------|------------|---------|---------|------------|-----------|-----------|-----------|----------|
| V1        | 0.594ij  | 0.644ij  | 0.314j   | 0.586ij   | 2.413g     | 1.684gh   | 0.215j    | 3.428f     | 1.321hi   | 4.325e     | 6.418d   | 0.230j   | 1.834gh    | 8.770c  | 11.675b | 4.000ef    | 4.729e    | 1.510ghi  | 1.497ghi  | 56.188a  |
| V2        | 0.346f   | 0.391f   | 0.206f   | 0.444f    | 1.909def   | 1.330ef   | 0.175f    | 2.185def   | 0.972ef   | 6.098c     | 4.709cd  | 0.2106f  | 1.506ef    | 6.132c  | 10.914b | 3.579cde   | 3.715cde  | 1.459ef   | 1.447ef   | 47.732a  |
| V3        | 0.222k   | 0.247k   | 0.228k   | 0.259k    | 2.231gh    | 1.515i    | 0.189k    | 2.550g     | 1.175j    | 2.526g     | 5.754d   | 0.207k   | 2.061h     | 6.267c  | 16.381b | 5.120e     | 3.589f    | 1.084j    | 1.075j    | 52.679a  |
| V4        | 0.173g   | 0.191g   | 0.099g   | 0.221g    | 1.298fg    | 0.892fg   | 0.124g    | 1.016fg    | 0.636fg   | 5.219d     | 2.784ef  | 0.105g   | 0.847fg    | 7.896c  | 11.739b | 2.885ef    | 4.688de   | 1.377fg   | 1.366fg   | 43.555a  |
| V5        | 1.291ef  | 1.453ef  | 0.499ef  | 0.564ef   | 3.084cde   | 2.139cdef | 0.247f    | 3.048cde   | 1.81def   | 4.539c     | 4.413c   | 0.211f   | 1.409ef    | 9.239b  | 11.097b | 3.14cde    | 4.182cd   | 1.229ef   | 1.218ef   | 54.812a  |
| V6        | 0.715fg  | 0.792fg  | 0.294g   | 0.572g    | 2.797def   | 1.904defg | 0.214g    | 3.148de    | 1.293efg  | 3.049de    | 7.712c   | 0.205g   | 1.393efg   | 8.189c  | 12.971b | 3.29de     | 3.615d    | 2.16defg  | 2.141defg | 56.451a  |
| V7        | 0.369i   | 0.409i   | 0.216i   | 0.359i    | 1.995fg    | 1.366fgh  | 0.164i    | 2.286f     | 0.964hi   | 1.576fgh   | 5.597d   | 0.156i   | 1.769fgh   | 5.838d  | 13.511b | 7.035c     | 4.069e    | 1.118ghi  | 1.108ghi  | 49.904a  |
| V8        | 0.586f   | 0.648ef  | 0.282f   | 0.546f    | 2.364ef    | 1.687ef   | 0.208f    | 2.508def   | 1.041ef   | 2.689def   | 6.051cd  | 0.210f   | 1.603ef    | 6.365c  | 11.635b | 3.916cdef  | 4.412cde  | 2.681def  | 2.657def  | 52.088a  |
| V9        | 0.391h   | 0.432h   | 0.331h   | 0.445h    | 3.674efg   | 2.439fgh  | 0.230h    | 3.443fg    | 1.383gh   | 6.008de    | 9.074c   | 0.301h   | 2.247fgh   | 7.945cd | 11.867b | 4.234ef    | 2.927fgh  | 2.478fgh  | 2.457fgh  | 62.305a  |
| V10       | 0.233jk  | 0.253jk  | 0.092k   | 0.368ijk  | 1.45gh     | 0.963ghi  | 0.158jk   | 1.59g      | 0.817hij  | 7.921c     | 6.731d   | 0.188jk  | 1.357gh    | 7.293d  | 12.805b | 2.458f     | 3.680e    | 1.044gh   | 1.035gh   | 50.437a  |
| V11       | 0.309d   | 0.334d   | 0.148d   | 0.602d    | 2.674cd    | 1.829d    | 0.288d    | 1.957d     | 1.113d    | 13.408b    | 10.313b  | 0.247d   | 2.615cd    | 6.233c  | 11.839b | 5.716b     | 5.571c    | 1.935d    | 1.918d    | 69.049a  |
| V12       | 0.623fg  | 0.678fg  | 0.285g   | 0.603fg   | 3.146ef    | 2.095efg  | 0.225g    | 3.146ef    | 1.515fg   | 6.274cd    | 8.656c   | 0.221g   | 2.322efg   | 7.376c  | 11.592b | 4.72de     | 6.934cd   | 2.387efg  | 2.366efg  | 65.166a  |
| V13       | 0.478i   | 0.527i   | 0.201i   | 0.752hi   | 3.187f     | 2.269fgh  | 0.305i    | 2.825fg    | 1.369ghi  | 9.130d     | 11.903c  | 0.229i   | 2.514fg    | 7.310e  | 14.92b  | 6.956e     | 5.866e    | 2.909fg   | 2.884fg   | 76.534a  |
| V14       | 0.280c   | 0.302c   | 0.169c   | 0.240c    | 1.609bc    | 1.225bc   | 0.127c    | 1.648bc    | 0.805bc   | 2.515bc    | 3.311bc  | 0.094c   | 1.415bc    | 4.067bc | 8.181b  | 4.425bc    | 3.989bc   | 1.023bc   | 1.014bc   | 36.439a  |
| V15       | 0.408e   | 0.436e   | 0.138e   | 0.276e    | 2.252de    | 1.495e    | 0.229e    | 0.852e     | 0.932e    | 4.577c     | 4.459c   | 0.157e   | 1.206e     | 5.808c  | 10.19b  | 3.759cd    | 4.416c    | 1.17e     | 1.160e    | 43.922a  |
| V16       | 0.427jk  | 0.460jk  | 0.152k   | 0.358k    | 2.599g     | 1.840h    | 0.157k    | 1.931h     | 0.938ij   | 3.113f     | 8.195c   | 0.226k   | 1.743h     | 5.537d  | 9.640b  | 4.502e     | 5.558d    | 1.386hi   | 1.375hi   | 50.136a  |
| V17       | 0.330h   | 0.361h   | 0.150h   | 0.265h    | 1.14fgh    | 0.749gh   | 0.088h    | 0.845fgh   | 0.636h    | 1.778efg   | 2.962d   | 0.118h   | 0.777gh    | 5.931c  | 9.032b  | 2.594de    | 1.815ef   | 0.885fgh  | 0.878fgh  | 31.335a  |
| V18       | 0.239ij  | 0.253ij  | 0.077j   | 0.296ij   | 1.697fg    | 1.199gh   | 0.121j    | 0.998gh    | 0.822hij  | 2.507e     | 5.275d   | 0.195j   | 1.346gh    | 5.963c  | 8.924b  | 2.306ef    | 4.774d    | 0.823hij  | 0.816hij  | 38.632a  |
| V19       | 0.353g   | 0.389g   | 0.113g   | 0.438g    | 2.54ef     | 1.877fg   | 0.238g    | 1.099fg    | 1.057fg   | 8.648c     | 8.127c   | 0.192g   | 1.825fg    | 4.819d  | 13.013b | 2.729ef    | 3.883de   | 2.958ef   | 2.932ef   | 57.23a   |
| V20       | 0.319c   | 0.345c   | 0.168c   | 0.231c    | 2.787c     | 1.971c    | 0.174c    | 1.207c     | 1.084c    | 4.672c     | 12.731b  | 0.331c   | 2.962c     | 2.983c  | 13.317b | 3.992c     | 3.658c    | 2.037c    | 2.020c    | 56.988a  |
| V21       | 0.778gh  | 0.860gh  | 0.296h   | 0.652gh   | 2.723defgh | 1.895fgh  | 0.166h    | 2.737defgh | 1.089fgh  | 3.906cdef  | 4.872cde | 0.187h   | 1.541fgh   | 5.236cd | 11.974b | 3.463cdefg | 5.640c    | 1.99efgh  | 1.973efgh | 51.977a  |
| V22       | 0.756hij | 0.829hij | 0.255ij  | 0.484hij  | 2.745ef    | 1.867fg   | 0.197j    | 2.485ef    | 1.18ghi   | 3.138ef    | 12.324b  | 0.334hij | 1.846fg    | 4.809d  | 10.073c | 3.079e     | 2.395ef   | 1.286gh   | 1.276gh   | 51.359a  |
| V23       | 0.512jk  | 0.567jk  | 0.164k   | 0.522jk   | 2.217gh    | 1.544hij  | 0.172k    | 1.753hi    | 1.033ijk  | 3.599ef    | 6.691c   | 0.195k   | 1.642hij   | 4.803d  | 9.355b  | 3.169fg    | 4.269de   | 1.425hij  | 1.413hij  | 45.043a  |
| V24       | 0.304f   | 0.346f   | 0.109f   | 0.394f    | 1.724def   | 1.21def   | 0.154f    | 1.119ef    | 0.770ef   | 5.157c     | 4.727c   | 0.185f   | 1.318def   | 3.972cd | 8.806b  | 2.874cdef  | 3.396cde  | 1.453def  | 1.441def  | 39.456a  |
| V25       | 0.358gh  | 0.384gh  | 0.221h   | 0.828gh   | 1.508fgh   | 1.088fgh  | 0.171h    | 1.896fg    | 0.739gh   | 2.571f     | 5.257de  | 0.128h   | 1.317fgh   | 9.002c  | 14.171b | 6.151d     | 4.438e    | 1.381fgh  | 1.369fgh  | 52.98a   |
| V26       | 0.380d   | 0.411d   | 0.445d   | 1.261d    | 2.101d     | 1.450d    | 0.161d    | 4.12cd     | 0.933d    | 2.127d     | 11.425b  | 0.210d   | 1.497d     | 9.696b  | 4.325cd | 7.991bc    | 2.577d    | 1.147d    | 1.138d    | 53.395a  |
| V27       | 0.303h   | 0.332h   | 0.298h   | 1.072h    | 1.763gh    | 1.262h    | 0.229h    | 5.453ef    | 0.915h    | 8.488d     | 23.269b  | 0.343h   | 2.408gh    | 7.951de | 18.686c | 5.571ef    | 4.038fg   | 1.311h    | 1.300h    | 84.99a   |
| V28       | 0.363d   | 0.403d   | 0.530d   | 1.081d    | 1.771d     | 1.257d    | 0.147d    | 1.667d     | 0.931d    | 1.374d     | 8.417bc  | 0.188d   | 1.128d     | 8.920bc | 11.901b | 4.587cd    | 4.126cd   | 1.477d    | 1.464d    | 51.732a  |
| V29       | 0.336h   | 0.363h   | 0.495h   | 1.462gh   | 2.434gh    | 1.689gh   | 0.207h    | 3.123fg    | 1.124gh   | 3.527efg   | 13.874b  | 0.199h   | 1.512gh    | 7.174d  | 11.664c | 5.700de    | 4.905def  | 1.26gh    | 1.249gh   | 62.294a  |
| V30       | 0.397d   | 0.440d   | 0.389d   | 1.831d    | 3.015d     | 2.168d    | 0.399d    | 4.272d     | 1.458d    | 7.923d     | 33.688b  | 0.399d   | 3.101d     | 18.055c | 20.29c  | 4.444d     | 8.487d    | 1.902d    | 1.886d    | 114.544a |
| V31       | 0.567g   | 0.615g   | 0.621g   | 2.427fg   | 4.026def   | 2.734efg  | 0.273g    | 4.152def   | 1.652fg   | 5.523de    | 26.975b  | 0.282g   | 2.372fg    | 19.631c | 18.489c | 2.567fg    | 5.779d    | 2.269fg   | 2.249fg   | 103.202a |
| V32       | 0.753gh  | 0.817gh  | 0.906gh  | 1.441fgh  | 2.41defg   | 1.66fgh   | 0.265h    | 3.975d     | 1.36fgh   | 4.083d     | 24.529b  | 0.381h   | 2.012efgh  | 14.068c | 15.439c | 3.578de    | 3.198def  | 1.118gh   | 1.108ghi  | 83.099a  |
| V33       | 0.728kl  | 0.801kl  | 0.87kl   | 2.379hij  | 3.943g     | 2.644hi   | 0.479i    | 5.131f     | 1.442jkl  | 8.609d     | 20.109c  | 0.339l   | 1.65ijk    | 20.153c | 23.704b | 4.369fg    | 6.898e    | 3.408gh   | 3.378gh   | 111.033a |
| V34       | 0.650kl  | 0.714kl  | 1.011jkl | 2.218hij  | 3.698fgh   | 2.575ghi  | 0.328l    | 5.066f     | 1.985ijk  | 10.196e    | 33.034b  | 0.349l   | 2.633ghi   | 19.382d | 23.899c | 4.818f     | 3.836fg   | 2.837ghi  | 2.812ghi  | 122.041a |
| V35       | 0.507ij  | 0.557ij  | 0.623ij  | 1.929ghi  | 3.216fg    | 2.186gh   | 0.288j    | 4.004ef    | 1.704hij  | 2.720fgh   | 42.112b  | 0.388ij  | 3.299fg    | 13.289d | 22.432c | 5.242e     | 1.455hij  | 1.557hij  | 1.544hij  | 109.053a |
| V36       | 0.663fgh | 0.743fgh | 0.22gh   | 1.022efgh | 2.737d     | 1.919def  | 0.243efgh | 2.074def   | 1.092efgh | 7.494c     | 6.482c   | 0.133h   | 1.63defg   | 6.768c  | 9.110b  | 2.248de    | 0.842efgh | 2.688d    | 2.665d    | 50.773a  |
| V37       | 0.613hi  | 0.705hi  | 0.153i   | 0.613hi   | 1.463efghi | 1.02fghi  | 0.175i    | 1.599efghi | 0.845ghi  | 2.295efg   | 8.302c   | 0.154i   | 1.391efghi | 4.340d  | 11.866b | 2.473ef    | 2.677e    | 1.837efgh | 1.821efgh | 44.341a  |
| V38       | 0.231h   | 0.264gh  | 0.115h   | 0.381gh   | 1.805fgh   | 1.269fgh  | 0.174h    | 0.869gh    | 0.749gh   | 5.699cd    | 7.435bc  | 0.170h   | 1.87fgh    | 4.600de | 8.775b  | 2.589efg   | 3.432ef   | 0.941gh   | 0.933gh   | 42.3a    |
| V39       | 0.381ef  | 0.422ef  | 0.194f   | 0.309f    | 1.651ef    | 1.191ef   | 0.172f    | 0.892ef    | 0.588ef   | 1.605ef    | 6.144c   | 0.138f   | 1.419ef    | 4.518cd | 11.530b | 2.645de    | 1.837ef   | 1.442ef   | 1.429ef   | 38.505a  |
| V40       | 0.628gh  | 0.692gh  | 0.217gh  | 0.401gh   | 2.566ef    | 1.812fg   | 0.216gh   | 1.803fg    | 0.991gh   | 5.178c     | 5.886c   | 0.176h   | 1.525fgh   | 4.769cd | 13.554b | 3.372de    | 3.532de   | 1.416fgh  | 1.404fgh  | 50.138a  |
| V41       | 0.190e   | 0.212e   | 0.081e   | 0.356e    | 1.931de    | 1.339e    | 0.183e    | 0.884e     | 0.808e    | 2.008de    | 4.721c   | 0.096e   | 1.560e     | 4.925c  | 13.057b | 4.006cd    | 4.100cd   | 0.792e    | 0.786e    | 42.034a  |
| V42       | 0.275fg  | 0.313fg  | 0.066g   | 0.178g    | 1.062defg  | 0.76efg   | 0.106g    | 0.676efg   | 0.49efg   | 2.143cdefg | 3.333c   | 0.107g   | 1.016defg  | 2.958cd | 7.654b  | 2.332cdef  | 2.585cde  | 0.534efg  | 0.53efg   | 27.12a   |
| V43       | 0.669e   | 0.741e   | 0.209e   | 0.635e    | 2.530e     | 1.730e    | 0.235e    | 1.797e     | 1.016e    | 2.035e     | 9.36c    | 0.174e   | 1.5210e    | 5.26de  | 13.756b | 2.878de    | 0.303e    | 1.813e    | 1.798e    | 48.461a  |

|     |          |          |          |          |          |          |        |           |          |           |         |         |           |          |         |           |          |          |          |         |
|-----|----------|----------|----------|----------|----------|----------|--------|-----------|----------|-----------|---------|---------|-----------|----------|---------|-----------|----------|----------|----------|---------|
| V44 | 0.576i   | 0.638i   | 0.226i   | 0.259i   | 1.867ef  | 1.328fg  | 0.200i | 1.713efg  | 0.746hi  | 1.241gh   | 5.437c  | 0.168i  | 1.377fg   | 5.087c   | 13.432b | 3.752d    | 0.238i   | 2.102e   | 2.084e   | 42.471a |
| V45 | 0.216gh  | 0.240gh  | 0.105h   | 0.308gh  | 1.324efg | 0.98gh   | 0.150h | 0.897gh   | 0.625gh  | 0.844gh   | 5.741c  | 0.122h  | 1.154efgh | 4.214d   | 7.567b  | 2.092e    | 1.869ef  | 0.774gh  | 0.768gh  | 29.99a  |
| V46 | 0.565h   | 0.626h   | 0.163h   | 0.726h   | 3.071ef  | 2.108gh  | 0.322h | 2.575ef   | 1.193gh  | 4.865d    | 13.37b  | 0.224h  | 2.876ef   | 4.908d   | 11.835c | 3.436e    | 5.553d   | 2.47ef   | 2.449ef  | 63.333a |
| V47 | 0.263d   | 0.281d   | 0.252d   | 0.302d   | 2.916cd  | 1.538cd  | 0.141d | 0.701d    | 0.883d   | 3.969cd   | 12.011b | 0.228d  | 2.088cd   | 7.111bc  | 12.032b | 3.492cd   | 4.075cd  | 1.884cd  | 1.868cd  | 56.036a |
| V48 | 0.282h   | 0.301h   | 0.474gh  | 0.217h   | 2.768e   | 1.914f   | 0.131h | 1.293fg   | 0.857gh  | 5.916c    | 3.997d  | 0.187h  | 1.002gh   | 12.495b  | 6.124c  | 4.42d     | 5.726c   | 0.925gh  | 0.917gh  | 49.945a |
| V49 | 0.266h   | 0.286h   | 0.276h   | 0.265h   | 2.36fg   | 1.608fgh | 0.127h | 1.07gh    | 0.925gh  | 6.279d    | 8.818c  | 0.237h  | 2.396fg   | 8.551c   | 11.164b | 3.194ef   | 4.187e   | 1.315gh  | 1.304gh  | 54.628a |
| V50 | 0.476gh  | 0.521gh  | 0.309h   | 0.712fgh | 2.841f   | 1.919fgh | 0.205h | 1.163fgh  | 0.976fgh | 10.266c   | 8.804cd | 0.186h  | 1.886fgh  | 8.254d   | 12.265b | 2.627fg   | 5.799e   | 1.809fgh | 1.793fgh | 62.811a |
| V51 | 0.181f   | 0.196f   | 0.334f   | 0.201f   | 1.465e   | 1.029ef  | 0.140f | 0.608ef   | 0.674ef  | 3.61d     | 3.874d  | 0.148f  | 1.411e    | 7.042c   | 12.062b | 3.934d    | 3.354d   | 0.654ef  | 0.649ef  | 41.565a |
| V52 | 0.191g   | 0.210g   | 0.129g   | 0.194g   | 1.535efg | 1.052fg  | 0.105g | 0.375g    | 0.512g   | 1.484efg  | 3.259de | 0.126g  | 0.957fg   | 7.203c   | 12.424b | 3.679d    | 2.7def   | 0.456g   | 0.452g   | 37.042a |
| V53 | 0.253j   | 0.275j   | 0.131j   | 0.208j   | 1.385g   | 0.984ghi | 0.090j | 0.419ij   | 0.438hij | 2.529ef   | 5.034d  | 0.114j  | 1.09gh    | 6.379c   | 7.795b  | 3.001e    | 2.083f   | 0.601hij | 0.596hij | 33.405a |
| V54 | 0.213e   | 0.233e   | 0.061e   | 0.187e   | 0.968de  | 0.791de  | 0.127e | 0.168e    | 0.471de  | 2.884cde  | 3.759cd | 0.072e  | 0.888de   | 9.04b    | 11.335b | 2.804cde  | 4.952c   | 0.618de  | 0.613de  | 40.187a |
| V55 | 0.253gh  | 0.271gh  | 0.392fgh | 0.2gh    | 1.483f   | 1.099fgh | 0.124h | 0.797fgh  | 0.587fgh | 1.320fg   | 4.274d  | 0.131h  | 1.217fgh  | 9.93c    | 11.219b | 3.205e    | 2.524e   | 0.481fgh | 0.477fgh | 39.985a |
| V56 | 0.358f   | 0.382f   | 0.324f   | 0.418f   | 2.361def | 1.715ef  | 0.169f | 0.782f    | 0.912f   | 1.038f    | 4.827cd | 0.108f  | 1.793ef   | 6.782c   | 12.874b | 4.39cde   | 5.182c   | 2.016ef  | 1.999ef  | 48.429a |
| V57 | 0.271e   | 0.307e   | 0.158e   | 0.41e    | 2.254de  | 1.538de  | 0.129e | 0.722e    | 0.921e   | 3.54d     | 9.037b  | 0.261e  | 1.457de   | 6.876c   | 10.050b | 2.259de   | 3.682d   | 0.957e   | 0.949e   | 45.778a |
| V58 | 0.378f   | 0.405f   | 0.175f   | 0.391f   | 1.201ef  | 0.844ef  | 0.136f | 0.54f     | 0.643f   | 2.252cdef | 4.812cd | 0.103f  | 1.374def  | 5.038c   | 8.304b  | 2.461cdef | 4.371cde | 1.291def | 1.28def  | 36.000a |
| V59 | 0.645f   | 0.689f   | 0.227f   | 0.669f   | 1.964fg  | 1.390f   | 0.296f | 2.141fg   | 0.986f   | 7.688c    | 7.443cd | 0.266f  | 2.024fg   | 4.694ef  | 13.802b | 4.919de   | 5.792cde | 1.914fg  | 1.898fg  | 59.448a |
| V60 | 0.578jk  | 0.612jk  | 0.201k   | 0.457jk  | 2.377gh  | 1.66ghi  | 0.230k | 1.449hij  | 0.818ijk | 1.385hij  | 12.79b  | 0.234k  | 2.665fg   | 4.92d    | 11.018c | 4.121de   | 3.373ef  | 2.261gh  | 2.242gh  | 53.391a |
| V61 | 0.417e   | 0.451e   | 0.223e   | 0.354e   | 1.971e   | 1.354e   | 0.140e | 1.277e    | 0.674e   | 2.274e    | 4.362de | 0.156d  | 1.168e    | 6.716e   | 12.908c | 4.240b    | 4.301d   | 1.711e   | 1.697e   | 46.395a |
| V62 | 0.562i   | 0.594i   | 0.232i   | 0.510i   | 2.374fgh | 1.681h   | 0.186i | 1.759h    | 0.863i   | 1.868gh   | 10.125c | 0.253i  | 1.813h    | 8.606d   | 12.605b | 2.816f    | 5.107e   | 2.58fg   | 2.558fg  | 57.093a |
| V63 | 0.155f   | 0.169f   | 0.068f   | 0.282f   | 1.968def | 1.345ef  | 0.138f | 0.507f    | 0.650f   | 3.131def  | 5.653cd | 0.128f  | 1.65ef    | 7.752c   | 13.721b | 5.606cd   | 4.946cde | 1.156ef  | 1.146ef  | 50.169a |
| V64 | 0.184e   | 0.199e   | 0.118e   | 0.182e   | 1.478de  | 0.998de  | 0.113e | 0.542de   | 0.556de  | 1.022de   | 5.325c  | 0.110e  | 1.171de   | 7.955b   | 8.727b  | 2.574de   | 2.893d   | 0.659de  | 0.653de  | 35.459a |
| V65 | 0.451e   | 0.471e   | 0.224e   | 0.548e   | 3.890e   | 2.599e   | 0.295e | 1.908e    | 1.449e   | 14.653bc  | 17.646b | 0.246e  | 2.932e    | 3.615e   | 12.845c | 4.103e    | 7.570d   | 2.141e   | 2.122e   | 79.711a |
| V66 | 0.709fgh | 0.755fgh | 0.497gh  | 0.446gh  | 2.711de  | 1.909efg | 0.183h | 1.815efgh | 1.03efgh | 2.210ef   | 8.082c  | 0.223gh | 1.969efg  | 8.047c   | 14.51b  | 4.031d    | 3.845d   | 2.260ef  | 2.240ef  | 57.471a |
| V67 | 0.443d   | 0.470d   | 0.301d   | 0.546d   | 3.915cd  | 2.870cd  | 0.204d | 2.486cd   | 1.333d   | 5.615cd   | 5.957cd | 0.209d  | 1.868d    | 8.241bc  | 12.998b | 5.814cd   | 6.622cd  | 1.668d   | 1.654d   | 63.213a |
| V68 | 0.193f   | 0.202f   | 0.283f   | 0.232f   | 1.993def | 1.426def | 0.125f | 0.916def  | 0.984def | 1.569def  | 7.420c  | 0.181f  | 1.715def  | 11.651b  | 11.405b | 3.480d    | 3.166de  | 0.501ef  | 0.497ef  | 47.941a |
| V69 | 0.459j   | 0.484j   | 0.311j   | 0.791ij  | 3.043g   | 2.086h   | 0.257j | 1.707h    | 1.083i   | 8.126d    | 10.437c | 0.244j  | 2.053h    | 10.557bc | 11.067b | 3.186fg   | 4.737e   | 3.715f   | 3.683f   | 68.026a |

Mean values (n = 3) indicated by the same letters in a line do not significantly different at 5% level using Duncan's multiple range test.

**Table S2.** Contents of 10 polyphenols and total polyphenols ( $\mu\text{g/g}$  dry matter) in 69 varieties of cabbage.

| Varieties | P1       | P2       | P3       | P4      | P5       | P6        | P7      | P8        | P9        | P10      | Total     |
|-----------|----------|----------|----------|---------|----------|-----------|---------|-----------|-----------|----------|-----------|
| V1        | 85.889c  | 6.238ef  | 23.418de | 0.691f  | 22.805de | 11.224def | 2.823f  | 25.234d   | 166.934b  | 2.588f   | 347.843a  |
| V2        | 83.993bc | 4.249d   | 28.172cd | 1.71d   | 14.041d  | 11.145d   | 2.201d  | 47.865bcd | 98.829b   | 2.801d   | 295.007a  |
| V3        | 96.376c  | 6.384e   | 26.140d  | 3.13e   | 3.929e   | 6.162e    | 3.863e  | 20.804d   | 115.259b  | 5.641e   | 287.688a  |
| V4        | 23.317c  | 6.992c   | 10.189c  | 3.575c  | 0.567c   | 3.265c    | 8.623c  | 78.608c   | 264.436b  | 4.323c   | 403.895a  |
| V5        | 27.757c  | 1.107c   | 14.683c  | 1.115c  | 18.989c  | 7.362c    | 7.263c  | 34.865c   | 162.068b  | 2.238c   | 277.447a  |
| V6        | 33.519b  | 15.467b  | 15.819b  | 2.06b   | 18.637b  | 8.140b    | 0.061b  | 32.154b   | 1020.646a | 7.906b   | 1154.41a  |
| V7        | 50.126c  | 4.626c   | 2.183c   | 2.870c  | 9.718c   | 2.495c    | 4.637c  | 24.651c   | 149.287b  | 1.72c    | 252.311a  |
| V8        | 9.828d   | 5.314d   | 11.206d  | 1.960d  | 15.937d  | 16.186d   | 5.068d  | 55.634c   | 100.099b  | 5.806d   | 227.038a  |
| V9        | 60.150c  | 3.910c   | 17.189c  | 1.252c  | 13.567c  | 18.39c    | 5.215c  | 31.294c   | 200.521b  | 1.626c   | 353.114a  |
| V10       | 44.502b  | 8.703cd  | 13.438cd | 0.273d  | 7.821cd  | 6.401cd   | 2.896cd | 24.241c   | 51.073b   | 2.492cd  | 161.841a  |
| V11       | 38.534c  | 8.131c   | 13.836c  | 4.132c  | 22.095c  | 14.717c   | 0.209c  | 26.031c   | 218.214b  | 2.738c   | 348.636a  |
| V12       | 69.032c  | 5.928c   | 13.962c  | 0.434c  | 4.897c   | 8.056c    | 1.965c  | 29.217c   | 239.378b  | 3.054c   | 375.922a  |
| V13       | 48.849c  | 15.157c  | 14.103c  | 1.249c  | 10.988c  | 10.834c   | 0.990c  | 49.595c   | 140.951b  | 0.804c   | 293.52a   |
| V14       | 19.282cd | 5.036d   | 14.882d  | 4.336d  | 18.985cd | 10.696d   | 2.111d  | 49.908c   | 116.574b  | 3.878d   | 245.69a   |
| V15       | 30.96de  | 13.848ef | 11.391ef | 3.558f  | 122.162b | 4.941f    | 2.145f  | 78.963c   | 45.487d   | 1.949f   | 315.403a  |
| V16       | 26.961d  | 14.942de | 70.229c  | 4.096e  | 28.342d  | 1.963e    | 2.801e  | 60.202c   | 122.194b  | 2.246e   | 333.977a  |
| V17       | 90.903e  | 10.583f  | 226.888c | 4.890f  | 153.575d | 6.427f    | 23.212f | 281.27b   | 170.052d  | 2.559f   | 970.357a  |
| V18       | 146.809b | 13.139e  | 113.151c | 4.525e  | 16.099e  | 9.133e    | 1.305e  | 47.177d   | 150.596b  | 1.389e   | 503.322a  |
| V19       | 47.975d  | 6.262e   | 149.746c | 8.810e  | 240.398b | 7.032e    | 1.721e  | 36.578d   | 58.932d   | 0.406e   | 557.860a  |
| V20       | 62.248c  | 4.46de   | 63.560c  | 4.458de | 19.371de | 5.558de   | 1.275e  | 46.094cd  | 117.605b  | 0.991e   | 325.620a  |
| V21       | 35.574cd | 6.894d   | 63.288c  | 3.378d  | 3.364d   | 6.086d    | 2.007d  | 47.231cd  | 125.086b  | 2.067d   | 294.975a  |
| V22       | 73.653b  | 8.871b   | 42.409b  | 8.087b  | 10.995b  | 4.150b    | 1.025b  | 25.757b   | 810.139a  | 0.692b   | 985.778a  |
| V23       | 153.482d | 4.565e   | 69.773de | 5.895e  | 413.267c | 7.499e    | 6.243e  | 74.738de  | 933.246b  | 2.354e   | 1671.063a |
| V24       | 179.169c | 2.561e   | 7.109de  | 0.360e  | 21.248de | 4.991e    | 1.864e  | 33.595d   | 271.585b  | 6.662de  | 529.142a  |
| V25       | 57.406bc | 3.936c   | 3.081c   | 2.127c  | 18.461c  | 2.742c    | 3.940c  | 23.563c   | 280.701ab | 1.659c   | 397.616a  |
| V26       | 49.975c  | 7.135d   | 2.060d   | 0.847d  | 7.764d   | 5.360d    | 7.859d  | 43.691c   | 883.596b  | 2.134d   | 1010.422a |
| V27       | 146.184c | 6.811d   | 4.195d   | 3.985d  | 6.400d   | 3.169d    | 4.392d  | 35.541d   | 573.396b  | 8.332d   | 792.404a  |
| V28       | 136.984c | 2.911d   | 2.522d   | 0.958d  | 7.305d   | 11.847d   | 9.511d  | 14.096d   | 825.881b  | 15.979d  | 1027.995a |
| V29       | 67.810d  | 4.671e   | 2.623e   | 3.47e   | 1.671e   | 24.489e   | 0.122e  | 22.098e   | 458.659b  | 165.703c | 751.316a  |
| V30       | 54.087c  | 4.442c   | 8.034c   | 0.798c  | 8.014c   | 5.089c    | 11.095c | 18.885c   | 763.636b  | 37.565c  | 911.644a  |
| V31       | 60.652cd | 5.875d   | 2.519d   | 1.305d  | 1.006d   | 2.132d    | 0.614d  | 14.477d   | 477.429b  | 180.214c | 746.224a  |
| V32       | 21.180c  | 1.64c    | 3.932c   | 0.899c  | 19.503c  | 5.705c    | 2.741c  | 15.948c   | 509.53b   | 28.845c  | 609.923a  |
| V33       | 52.523c  | 3.166d   | 2.945d   | 1.259d  | 5.850d   | 3.753d    | 0.643d  | 13.639d   | 248.988b  | 27.016cd | 359.781a  |
| V34       | 17.834c  | 5.888c   | 5.544c   | 0.252c  | 0.325c   | 3.088c    | 2.371c  | 11.231c   | 357.722b  | 24.921c  | 429.177a  |
| V35       | 38.394c  | 4.344d   | 4.388d   | 0.763d  | 2.723d   | 1.754d    | 3.208d  | 15.001d   | 264.109b  | 9.003d   | 343.687a  |
| V36       | 19.35cd  | 7.421d   | 5.277d   | 1.193d  | 19.857cd | 2.263d    | 3.282d  | 21.888cd  | 577.566b  | 37.797c  | 695.894a  |
| V37       | 62.156c  | 8.337c   | 4.427c   | 0.554c  | 0.797c   | 2.309c    | 4.197c  | 19.113c   | 829.290b  | 5.805c   | 936.985a  |
| V38       | 89.875b  | 6.978b   | 4.547b   | 0.857b  | 2.002b   | 1.710b    | 1.395b  | 32.999b   | 699.222a  | 16.159b  | 855.746a  |
| V39       | 57.963c  | 5.639c   | 5.233c   | 3.563c  | 4.001c   | 1.872c    | 2.930c  | 21.484c   | 582.576b  | 8.996c   | 694.256a  |
| V40       | 58.658b  | 2.649b   | 2.566b   | 1.156b  | 6.962b   | 2.878b    | 4.938b  | 11.792b   | 350.621a  | 12.486b  | 454.708a  |
| V41       | 154.652c | 8.412d   | 7.663d   | 2.148d  | 26.653d  | 7.790d    | 3.205d  | 3.762d    | 866.261b  | 17.208d  | 1097.754a |
| V42       | 38.309c  | 4.667d   | 4.695d   | 4.331d  | 36.477c  | 2.232d    | 6.101d  | 22.805cd  | 708.132b  | 12.549d  | 840.300a  |
| V43       | 58.413b  | 5.509b   | 3.910b   | 0.422b  | 13.160b  | 2.337b    | 2.533b  | 15.558b   | 388.781a  | 14.842b  | 505.464a  |
| V44       | 48.803c  | 5.969c   | 12.23c   | 2.023c  | 11.669c  | 11.148c   | 9.811c  | 17.926c   | 438.662b  | 13.101c  | 571.342a  |
| V45       | 54.408c  | 6.454c   | 3.160c   | 1.586c  | 27.028c  | 12.145c   | 1.509c  | 23.037c   | 288.920b  | 11.896c  | 430.144a  |
| V46       | 62.305c  | 6.536d   | 2.554d   | 0.489d  | 24.127cd | 11.469d   | 2.998d  | 17.672cd  | 251.692b  | 26.978cd | 406.819a  |
| V47       | 85.483c  | 5.943d   | 3.578d   | 4.439d  | 16.796cd | 3.641d    | 6.491d  | 11.402cd  | 651.484b  | 13.998cd | 803.256a  |
| V48       | 59.144c  | 7.127d   | 3.18d    | 2.284d  | 15.244cd | 4.979d    | 1.345d  | 15.409cd  | 272.035b  | 19.421cd | 400.166a  |

|     |          |          |          |          |          |         |         |          |           |         |          |
|-----|----------|----------|----------|----------|----------|---------|---------|----------|-----------|---------|----------|
| V49 | 97.883c  | 3.195c   | 3.419c   | 0.397c   | 8.996c   | 2.935c  | 4.611c  | 21.224c  | 382.435b  | 16.342c | 541.437a |
| V50 | 62.572c  | 2.797c   | 5.454c   | 4.648c   | 5.285c   | 3.331c  | 0.980c  | 17.584c  | 212.124b  | 15.15c  | 329.925a |
| V51 | 23.727c  | 4.547c   | 5.527c   | 3.617c   | 20.303c  | 6.659c  | 3.661c  | 24.845c  | 237.890b  | 31.578c | 362.355a |
| V52 | 38.406c  | 6.887fgh | 8.84fg   | 0.114h   | 10.746ef | 2.429gh | 1.507gh | 26.883d  | 246.444b  | 16.855e | 359.111a |
| V53 | 25.618c  | 8.689c   | 5.854c   | 1.799c   | 40.596c  | 0.607c  | 0.176c  | 14.086c  | 792.838b  | 1.843c  | 892.106a |
| V54 | 6.771c   | 7.128c   | 3.597c   | 2.373c   | 39.089c  | 0.885c  | 0.535c  | 18.864c  | 554.297b  | 1.403c  | 634.943a |
| V55 | 32.037c  | 8.570c   | 3.734c   | 0.796c   | 24.473c  | 10.654c | 0.063c  | 13.633c  | 440.326b  | 0.690c  | 534.975a |
| V56 | 16.035c  | 6.489d   | 66.28d   | 1.291d   | 35.07d   | 3.751d  | 4.182d  | 7.194d   | 482.738b  | 1.380d  | 624.411a |
| V57 | 65.911c  | 9.033de  | 44.504cd | 0.548e   | 12.085de | 3.648de | 0.087e  | 15.882de | 220.102b  | 1.136e  | 372.935a |
| V58 | 52.668c  | 8.047d   | 23.473cd | 1.681d   | 28.454cd | 0.741d  | 0.368d  | 24.006cd | 646.354b  | 1.004d  | 786.796a |
| V59 | 115.189c | 4.278e   | 85.581cd | 2.505e   | 45.027de | 1.689e  | 5.011e  | 5.981e   | 507.072b  | 2.180e  | 774.512a |
| V60 | 91.684c  | 4.205e   | 1.112e   | 2.086e   | 21.986d  | 9.925e  | 0.198e  | 8.220e   | 317.159b  | 1.306e  | 457.880a |
| V61 | 12.274d  | 6.721def | 1.193fg  | 4.051efg | 25.332c  | 7.808de | 0.073g  | 23.230c  | 760.777b  | 1.225fg | 842.683a |
| V62 | 47.44c   | 6.779c   | 9.732c   | 4.145c   | 28.202c  | 10.903c | 0.203c  | 19.421c  | 687.449b  | 2.690c  | 816.962a |
| V63 | 41.579c  | 3.000c   | 0.897c   | 2.140c   | 25.696c  | 11.740c | 0.102c  | 20.848c  | 786.275bc | 0.706c  | 892.982a |
| V64 | 44.872b  | 5.73b    | 4.125b   | 3.261b   | 34.865b  | 14.625b | 0.185b  | 11.529b  | 822.217a  | 1.784b  | 943.192a |
| V65 | 44.675c  | 2.174c   | 1.693c   | 1.623c   | 32.580c  | 25.238c | 1.05c   | 13.014c  | 437.563b  | 0.559c  | 560.169a |
| V66 | 46.027c  | 3.468c   | 1.905c   | 2.234c   | 20.554c  | 5.891c  | 0.204c  | 14.942c  | 520.646b  | 2.057c  | 617.928a |
| V67 | 31.079cd | 1.927d   | 55.189c  | 0.83d    | 22.992cd | 12.212d | 0.374d  | 18.896cd | 475.022b  | 2.085d  | 620.608a |
| V68 | 17.680c  | 4.119c   | 4.944c   | 1.794c   | 39.912c  | 15.480c | 0.055c  | 27.419c  | 789.442b  | 0.410c  | 901.256a |
| V69 | 70.879c  | 8.496c   | 1.294c   | 2.721c   | 39.823c  | 21.996c | 0.336c  | 25.329c  | 625.956b  | 1.388c  | 798.219a |

Mean values (n = 3) indicated by the same letters in a line do not significantly different at 5% level using Duncan's multiple range test.

Table S3. Total variance explained.

| Component | Initial Eigenvalues |               |              | Extraction Sums of Squared Loadings |               |              |
|-----------|---------------------|---------------|--------------|-------------------------------------|---------------|--------------|
|           | Total               | % of Variance | Cumulative % | Total                               | % of Variance | Cumulative % |
| 1         | 10.494              | 36.185        | 36.185       | 10.494                              | 36.185        | 36.185       |
| 2         | 3.022               | 10.419        | 46.604       | 3.022                               | 10.419        | 46.604       |
| 3         | 2.310               | 7.964         | 54.568       | 2.310                               | 7.964         | 54.568       |
| 4         | 1.991               | 6.866         | 61.434       | 1.991                               | 6.866         | 61.434       |
| 5         | 1.355               | 4.672         | 66.107       | 1.355                               | 4.672         | 66.107       |
| 6         | 1.236               | 4.260         | 70.367       | 1.236                               | 4.260         | 70.367       |
| 7         | 1.165               | 4.019         | 74.386       | 1.165                               | 4.019         | 74.386       |
| 8         | 0.971               | 3.349         | 77.734       |                                     |               |              |
| 9         | 0.902               | 3.109         | 80.843       |                                     |               |              |
| 10        | 0.851               | 2.935         | 83.778       |                                     |               |              |
| 11        | 0.819               | 2.825         | 86.603       |                                     |               |              |
| 12        | 0.677               | 2.333         | 88.936       |                                     |               |              |
| 13        | 0.535               | 1.845         | 90.782       |                                     |               |              |
| 14        | 0.514               | 1.772         | 92.553       |                                     |               |              |
| 15        | 0.475               | 1.637         | 94.190       |                                     |               |              |
| 16        | 0.389               | 1.342         | 95.532       |                                     |               |              |
| 17        | 0.263               | 0.906         | 96.438       |                                     |               |              |
| 18        | 0.237               | 0.817         | 97.255       |                                     |               |              |
| 19        | 0.172               | 0.594         | 97.849       |                                     |               |              |
| 20        | 0.152               | 0.526         | 98.375       |                                     |               |              |
| 21        | 0.135               | 0.466         | 98.841       |                                     |               |              |
| 22        | 0.114               | 0.394         | 99.235       |                                     |               |              |
| 23        | 0.083               | 0.285         | 99.520       |                                     |               |              |
| 24        | 0.069               | 0.240         | 99.759       |                                     |               |              |

|    |       |       |        |
|----|-------|-------|--------|
| 25 | 0.046 | 0.159 | 99.918 |
| 26 | 0.016 | 0.055 | 99.973 |
| 27 | 0.007 | 0.025 | 99.998 |
| 28 | 0.000 | 0.002 | 100    |
| 29 | 0.000 | 0.000 | 100    |

Extraction Method: Principal Component Analysis.

**Table S4.** Component matrix.

| Index | Component |        |        |        |        |        |        |
|-------|-----------|--------|--------|--------|--------|--------|--------|
|       | 1         | 2      | 3      | 4      | 5      | 6      | 7      |
| Thr   | 0.587     | 0.238  | 0.130  | −0.706 | 0.035  | −0.110 | 0.062  |
| Phe   | 0.576     | 0.235  | 0.142  | −0.714 | 0.034  | −0.116 | 0.058  |
| Trp   | 0.745     | −0.261 | 0.373  | −0.091 | −0.065 | 0.099  | 0.169  |
| Leu   | 0.826     | −0.188 | 0.370  | 0.114  | 0.081  | 0.188  | 0.020  |
| Ile   | 0.866     | 0.172  | −0.236 | −0.038 | −0.015 | 0.070  | 0.092  |
| Asn   | 0.869     | 0.175  | −0.243 | −0.047 | −0.031 | 0.077  | 0.098  |
| Met   | 0.882     | 0.119  | −0.058 | 0.009  | 0.035  | −0.023 | −0.095 |
| Tyr   | 0.838     | −0.022 | 0.274  | 0.039  | −0.078 | −0.118 | 0.065  |
| Val   | 0.901     | 0.146  | 0.042  | −0.060 | −0.077 | −0.059 | 0.090  |
| Pro   | 0.551     | 0.256  | −0.346 | 0.303  | −0.056 | 0.027  | −0.100 |
| Ala   | 0.789     | −0.177 | 0.281  | 0.280  | 0.148  | −0.008 | −0.211 |
| Gly   | 0.809     | 0.070  | 0.126  | 0.193  | 0.122  | −0.195 | −0.174 |
| Ser   | 0.723     | 0.084  | −0.227 | 0.301  | 0.124  | −0.283 | −0.190 |
| His   | 0.657     | −0.342 | 0.356  | 0.139  | −0.101 | 0.330  | 0.021  |
| Glu   | 0.737     | −0.138 | 0.205  | 0.179  | −0.033 | −0.026 | −0.265 |
| Asp   | 0.336     | −0.108 | −0.068 | 0.354  | −0.326 | −0.322 | 0.219  |
| Arg   | 0.418     | 0.131  | −0.358 | 0.368  | −0.121 | 0.150  | 0.139  |
| Gln   | 0.694     | 0.381  | −0.295 | −0.188 | 0.082  | 0.101  | −0.072 |
| Lys   | 0.694     | 0.381  | −0.295 | −0.188 | 0.082  | 0.101  | −0.072 |
| P1    | −0.093    | 0.195  | 0.128  | 0.342  | 0.507  | −0.414 | 0.048  |
| P2    | −0.243    | 0.273  | −0.003 | 0.036  | −0.200 | 0.409  | −0.432 |
| P3    | −0.205    | 0.782  | 0.310  | 0.160  | −0.072 | 0.083  | −0.035 |
| P4    | −0.262    | 0.546  | −0.006 | 0.171  | 0.292  | 0.238  | −0.081 |
| P5    | −0.196    | 0.604  | 0.158  | 0.106  | 0.404  | 0.144  | 0.122  |
| P6    | 0.124     | 0.129  | −0.461 | 0.159  | 0.015  | 0.052  | 0.654  |
| P7    | −0.121    | 0.376  | 0.652  | 0.087  | −0.146 | −0.276 | 0.216  |
| P8    | −0.283    | 0.650  | 0.473  | 0.148  | −0.290 | 0.084  | 0.145  |
| P9    | −0.099    | −0.317 | 0.118  | −0.094 | 0.668  | 0.087  | 0.096  |
| P10   | 0.340     | −0.277 | 0.213  | 0.156  | 0.153  | 0.495  | 0.324  |

Extraction Method: Principal Component Analysis. P1-P10 are defined in Table 1. 7 components extracted.

**Table S5.** Comprehensive evaluation of 29 kinds of amino acids and polyphenols based on principal component analysis.

| Varieties | Score of PC1 | Score of PC2 | Score of PC3 | Score of PC4 | Score of PC5 | Score of PC6 | Score of PC7 | Total Score | Ranking |
|-----------|--------------|--------------|--------------|--------------|--------------|--------------|--------------|-------------|---------|
| V1        | 0.380        | 0.158        | −0.041       | −0.359       | −0.634       | −0.896       | 0.655        | 0.085       | 26      |
| V2        | −0.296       | 0.185        | −0.289       | 0.329        | −0.586       | −0.735       | 0.458        | −0.129      | 39      |
| V3        | −0.171       | −0.139       | 0.059        | 1.148        | −0.659       | −1.248       | −0.403       | −0.093      | 37      |
| V4        | −1.096       | 0.113        | 0.434        | 0.471        | −1.373       | 0.817        | −0.283       | −0.359      | 57      |
| V5        | 0.968        | 0.626        | 0.929        | −3.547       | −1.068       | −1.385       | 1.883        | 0.213       | 18      |
| V6        | 0.391        | 0.278        | −0.064       | −1.728       | 0.475        | 1.478        | −0.773       | 0.101       | 23      |
| V7        | −0.313       | −0.427       | 0.131        | 0.389        | −1.365       | −1.432       | 0.148        | −0.240      | 48      |
| V8        | 0.297        | 0.724        | −0.541       | −1.049       | −1.247       | 0.057        | 1.153        | 0.058       | 29      |
| V9        | 0.878        | 0.618        | −0.871       | 0.146        | −0.520       | −0.989       | 1.261        | 0.307       | 14      |
| V10       | −0.651       | −0.444       | −0.225       | 0.500        | −1.231       | 0.129        | −1.127       | −0.363      | 59      |
| V11       | 0.535        | 0.709        | −1.893       | 1.555        | −0.688       | −0.025       | −0.309       | 0.178       | 21      |
| V12       | 0.904        | 0.524        | −0.989       | −0.338       | −0.811       | −0.783       | 0.391        | 0.224       | 16      |
| V13       | 1.103        | 1.096        | −1.482       | 0.689        | −1.803       | 0.211        | −1.016       | 0.327       | 13      |
| V14       | −0.936       | −0.015       | −0.481       | 0.163        | −1.189       | 0.132        | 0.837        | −0.384      | 61      |
| V15       | −0.607       | 1.008        | −0.147       | −0.015       | −1.208       | 1.323        | −0.835       | −0.161      | 44      |
| V16       | −0.294       | 1.120        | −0.072       | 0.259        | −1.570       | 0.987        | −1.405       | −0.065      | 36      |
| V17       | −1.806       | 4.102        | 4.381        | 1.061        | −1.817       | 0.361        | 1.343        | 0.180       | 20      |
| V18       | −1.080       | 1.029        | 0.131        | 1.168        | 0.124        | 0.529        | −0.900       | −0.201      | 46      |
| V19       | −0.021       | 3.227        | −0.693       | 0.630        | 1.281        | 1.639        | −1.022       | 0.405       | 10      |
| V20       | 0.193        | 1.036        | −0.775       | 0.874        | 0.079        | −1.041       | −1.212       | 0.087       | 24      |
| V21       | 0.264        | 1.073        | −0.161       | −1.417       | −1.015       | 0.207        | 0.060        | 0.061       | 28      |
| V22       | 0.144        | 0.855        | 0.407        | −1.125       | 1.823        | −0.100       | −1.082       | 0.134       | 22      |
| V23       | −0.540       | 2.513        | 1.139        | 0.495        | 4.015        | −0.084       | 1.430        | 0.433       | 8       |
| V24       | −0.707       | −0.173       | −0.265       | 0.317        | 1.020        | −1.713       | 0.178        | −0.292      | 53      |
| V25       | −0.383       | −0.700       | 0.363        | 0.327        | −0.907       | −0.672       | 0.132        | −0.226      | 47      |
| V26       | −0.027       | −0.894       | 1.344        | 0.271        | −0.637       | −1.064       | 1.429        | 0.005       | 33      |
| V27       | 0.636        | −0.274       | 1.117        | 2.228        | 1.013        | −1.815       | −1.441       | 0.356       | 12      |
| V28       | −0.175       | −0.863       | 1.102        | 0.299        | 1.080        | −1.101       | 1.975        | 0.038       | 31      |
| V29       | 0.531        | −1.083       | 0.078        | 1.377        | 0.530        | 2.163        | 3.800        | 0.450       | 7       |
| V30       | 2.110        | −0.513       | 1.317        | 2.213        | 0.428        | −0.199       | −0.533       | 0.957       | 4       |
| V31       | 2.286        | −1.169       | 1.463        | 0.586        | 0.983        | 3.600        | 0.578        | 1.084       | 2       |
| V32       | 1.374        | −1.216       | 1.956        | −0.781       | 0.178        | −0.300       | 0.330        | 0.481       | 6       |
| V33       | 2.896        | −0.184       | 0.707        | −0.247       | −0.363       | 1.250        | −0.442       | 1.087       | 1       |
| V34       | 2.901        | −0.670       | 1.391        | 0.149        | −0.712       | 0.721        | −1.166       | 1.052       | 3       |
| V35       | 1.976        | −1.086       | 1.848        | 0.797        | −0.149       | −1.329       | −1.890       | 0.664       | 5       |
| V36       | 0.351        | 0.232        | −0.153       | −2.130       | 0.406        | 1.031        | −0.533       | 0.034       | 32      |
| V37       | −0.436       | −0.387       | 0.431        | −1.676       | 0.840        | −0.292       | −0.898       | −0.288      | 52      |
| V38       | −0.749       | −0.677       | −0.221       | 0.389        | 0.777        | −0.283       | −0.847       | −0.342      | 56      |
| V39       | −0.811       | −0.439       | 0.179        | −0.782       | 0.752        | −0.036       | −0.836       | −0.379      | 60      |
| V40       | 0.044        | −0.191       | −0.049       | −1.155       | −0.103       | −1.062       | 0.097        | −0.133      | 40      |
| V41       | −0.854       | −0.672       | −0.178       | 0.968        | 1.572        | −0.580       | 0.109        | −0.274      | 51      |
| V42       | −1.556       | −0.582       | 0.487        | −0.388       | 0.807        | 0.082        | −0.056       | −0.573      | 66      |
| V43       | 0.068        | −0.299       | 0.363        | −1.947       | 0.293        | −0.659       | −0.729       | −0.155      | 43      |
| V44       | −0.337       | 0.124        | 0.522        | −1.480       | 0.029        | −0.862       | 0.460        | −0.186      | 45      |
| V45       | −1.246       | −0.740       | −0.199       | −0.213       | 0.030        | 0.207        | 0.320        | −0.535      | 65      |
| V46       | 0.871        | 0.490        | −1.151       | −0.257       | 0.085        | −0.514       | 0.037        | 0.240       | 15      |
| V47       | −0.173       | −0.002       | −0.192       | 0.625        | 1.152        | −0.188       | −0.563       | −0.012      | 34      |
| V48       | −0.313       | −0.652       | −0.387       | 0.461        | −0.947       | 0.981        | 0.761        | −0.152      | 42      |

---

|     |        |        |        |        |        |        |        |        |    |
|-----|--------|--------|--------|--------|--------|--------|--------|--------|----|
| V49 | −0.157 | −0.557 | −0.153 | 0.770  | 0.269  | −1.089 | −0.232 | −0.117 | 38 |
| V50 | 0.311  | 0.239  | −0.875 | 0.073  | 0.227  | 0.451  | −0.429 | 0.085  | 25 |
| V51 | −0.908 | −0.830 | 0.158  | 0.630  | −0.701 | 0.448  | 0.314  | −0.360 | 58 |
| V52 | −1.225 | −1.256 | 0.248  | 0.119  | −1.090 | 0.227  | −0.477 | −0.607 | 67 |
| V53 | −1.389 | −1.122 | 0.096  | −0.462 | 0.407  | 0.767  | −0.950 | −0.630 | 69 |
| V54 | −1.356 | −1.086 | −0.086 | 0.017  | −0.390 | 1.298  | −0.883 | −0.608 | 68 |
| V55 | −0.985 | −1.335 | 0.112  | −0.127 | −0.593 | 0.704  | 0.077  | −0.490 | 64 |
| V56 | −0.238 | 0.062  | −0.313 | −0.331 | −0.651 | 0.415  | −0.125 | −0.145 | 41 |
| V57 | −0.554 | −0.337 | −0.181 | 0.179  | −0.364 | 0.203  | −1.257 | −0.296 | 54 |
| V58 | −1.046 | −0.469 | −0.094 | −0.647 | 0.433  | 0.540  | −0.916 | −0.473 | 62 |
| V59 | 0.356  | 0.932  | 0.102  | 0.115  | 0.810  | −1.629 | −0.591 | 0.187  | 19 |
| V60 | 0.218  | 0.073  | −0.904 | −0.564 | 0.890  | −1.367 | −0.254 | −0.051 | 35 |
| V61 | −0.511 | −0.384 | −0.518 | −0.602 | 0.248  | 0.889  | −0.020 | −0.259 | 50 |
| V62 | 0.211  | 0.298  | −0.718 | −0.781 | 1.137  | 0.760  | −0.274 | 0.071  | 27 |
| V63 | −0.682 | −0.973 | −0.957 | 0.997  | 0.198  | −0.163 | 0.798  | −0.321 | 55 |
| V64 | −1.281 | −1.033 | −0.403 | 0.107  | 0.990  | 0.789  | 0.709  | −0.488 | 63 |
| V65 | 1.233  | 0.733  | −2.765 | 1.123  | 0.217  | −0.707 | 1.593  | 0.424  | 9  |
| V66 | 0.495  | −0.161 | −0.292 | −1.465 | 0.383  | −0.392 | 0.072  | 0.043  | 30 |
| V67 | 0.744  | 0.165  | −1.226 | 0.280  | −0.866 | −0.323 | 1.668  | 0.221  | 17 |
| V68 | −0.622 | −1.227 | −0.145 | 0.473  | 0.224  | 0.494  | 1.079  | −0.257 | 49 |
| V69 | 0.865  | 0.916  | −1.847 | −0.153 | 1.052  | 1.167  | 0.576  | 0.373  | 11 |

---

Total score was weighted by the contribution of each PC to variance. PC principal component.

Table S6. Basic information of 69 varieties of cabbage.

| Number | Variety name | origin                                                                        | Leaf color | Spherical shape | Compactness |
|--------|--------------|-------------------------------------------------------------------------------|------------|-----------------|-------------|
| V1     | GA1827       | Caiyuan Seed Shop, Yuexiu District, Guangzhou                                 | Green      | circular type   | Tight       |
| V2     | Zhonggan595  | Institute of Vegetables and Flowers, Chinese Academy of Agricultural Sciences | Green      | circular type   | Tight       |
| V3     | Houteng50    | Shandong Lufa Agricultural Technology Co., Ltd.                               | Green      | circular type   | Tight       |
| V4     | Jiaoyang     | Shanxi Qianyousheng Agricultural Technology Co., Ltd.                         | Green      | circular type   | Medium      |
| V5     | Zhonggan828  | Institute of Vegetables and Flowers, Chinese Academy of Agricultural Sciences | Green      | circular type   | Tight       |
| V6     | GL1903       | Tianjin Gengyun Seed Industry Co., Ltd.                                       | Green      | circular type   | Loose       |
| V7     | Meicui1      | Hebei Xingtai Jinshi Seed Industry Co., Ltd.                                  | Green      | Elliptic type   | Tight       |
| V8     | 14468        | Beijing Jieli Seed Industry Co., Ltd.                                         | Green      | circular type   | Medium      |
| V9     | Xingshu25    | Lanzhou Runfeng Seed Industry Co., Ltd.                                       | Green      | circular type   | Medium      |
| V10    | Yu-4         | Shantou Xintiandi Agriculture Co., Ltd.                                       | Green      | circular type   | Loose       |
| V11    | Lvbao55      | Xingtai Dali Seedling Company                                                 | Green      | Elliptic type   | Tight       |
| V12    | 17gl-3008    | Sichuan Zhongdu Hi-Tech Seed Industry Co., Ltd.                               | Green      | circular type   | Tight       |
| V13    | Meidi60MS    | Xingtai Chenhui Seed Industry Co., Ltd.                                       | Green      | circular type   | Tight       |
| V14    | Duofulvguan1 | Tianjin Jinmu Maohe Agricultural Technology Co., Ltd.                         | Green      | circular type   | Medium      |
| V15    | 1836         | Beijing Jingyan Yinong Seed Industry Technology Co., Ltd.                     | Green      | circular type   | Loose       |
| V16    | Chunbao5     | Hebei Xingtai Tianfeng Seed Industry Co., Ltd.                                | Green      | circular type   | Medium      |
| V17    | Lixin266     | Fuzhou Lixin Seedling Co., Ltd.                                               | Green      | circular type   | Tight       |
| V18    | Bicui6022    | Lanzhou Baofeng Seedling Co., Ltd.                                            | Green      | circular type   | Tight       |
| V19    | Dingfeng     | Lvheng Technology Group Co., Ltd.                                             | Green      | circular type   | Tight       |
| V20    | GA1826       | Caiyuan Seed Shop, Yuexiu District, Guangzhou                                 | Green      | Elliptic type   | Medium      |
| V21    | 19-1523      | Ningxia Jufeng Seedling Co., Ltd.                                             | Green      | circular type   | Medium      |
| V22    | Ganlan-6     | Lanzhou Tianyuan Seedling Co., Ltd.                                           | Green      | circular type   | Medium      |
| V23    | GS-19-007    | Xingtai Jialihe Seedling Co., Ltd.                                            | Green      | circular type   | Medium      |
| V24    | Tietou65     | Beijing Huanai Agricultural Development Co., Ltd.                             | Green      | circular type   | Tight       |
| V25    | Lvying50     | Xingtai Dali Seedling Company                                                 | Green      | circular type   | Tight       |
| V26    | Lvxiu        | Henan Yuyi Seed Industry Technology Development Co., Ltd.                     | Green      | circular type   | Tight       |
| V27    | ZaohuoB      | Hubei Xiangyang photosynthesis fruit and vegetable Co., Ltd                   | Green      | circular type   | Loose       |
| V28    | ZSGL-01      | Gansu Zeshi Agricultural Technology Co., Ltd.                                 | Green      | circular type   | Tight       |
| V29    | Letu         | Shanxi Qianyousheng Agricultural Technology Co., Ltd.                         | Green      | circular type   | Medium      |
| V30    | Shuoyuan2    | Beijing Shuoyuan Seed Co., Ltd.                                               | Dark green | circular type   | Medium      |

|     |                |                                                                     |             |               |        |
|-----|----------------|---------------------------------------------------------------------|-------------|---------------|--------|
| V31 | Jingdinghaoyue | Lanzhou Dongping Seed Co., Ltd.                                     | Green       | circular type | Tight  |
| V32 | Lvsejingdian   | Beijing Dele Runcheng Agricultural Technology Development Co., Ltd. | Green       | circular type | Tight  |
| V33 | 1802           | Beijing Jingyan Yinong Seed Industry Technology Co., Ltd.           | Green       | circular type | Tight  |
| V34 | Lvxiu2         | Henan Yuyi Seed Industry Technology Development Co., Ltd.           | Green       | circular type | Tight  |
| V35 | GL1901         | Tianjin Gengyun Seed Industry Co., Ltd.                             | Green       | circular type | Tight  |
| V36 | Shunyuanyuan   | Hebei Xingtai City Xingpai Vegetable Seed Co., Ltd.                 | Green       | circular type | Loose  |
| V37 | Shenlong70     | Hebei Xingtai Shenlong Seed Industry Co., Ltd.                      | Green       | circular type | Tight  |
| V38 | Jiutouniao23   | Wuhan Jiutou Bird Seedling Co., Ltd.                                | Light green | circular type | Tight  |
| V39 | Tian53         | Xingtai Dali Seedling Company                                       | Dark green  | circular type | Medium |
| V40 | Tian55         | Xingtai Jialihe Seedling Co., Ltd.                                  | Green       | circular type | Tight  |
| V41 | Lvxianfeng     | Beijing Dele Runcheng Agricultural Technology Development Co., Ltd. | Green       | circular type | Tight  |
| V42 | 17gl-2016      | Sichuan Zhongdu Hi-Tech Seed Industry Co., Ltd.                     | Green       | circular type | Medium |
| V43 | 58             | Xingtai Dali Seedling Company                                       | Green       | circular type | Loose  |
| V44 | GL1824         | Guangzhou Xingtian Seed Industry Co., Ltd.                          | Green       | circular type | Tight  |
| V45 | Chunguan       | Shanghai Huiyang Seedling Co., Ltd.                                 | Dark green  | circular type | Medium |
| V46 | GL1904         | Tianjin Gengyun Seed Industry Co., Ltd.                             | Dark green  | circular type | Medium |
| V47 | Xidinong       | Tianjin Jinmu Maohe Agricultural Technology Co., Ltd.               | Green       | circular type | Tight  |
| V48 | MR-ZL(K2-24)   | Handan Manrun Agricultural Technology Co., Ltd.                     | Green       | circular type | Tight  |
| V49 | 17gl-2011      | Sichuan Zhongdu Hi-Tech Seed Industry Co., Ltd.                     | Green       | circular type | Tight  |
| V50 | Gan56          | Beijing Jingyan Yinong Seed Industry Technology Co., Ltd.           | Green       | circular type | Tight  |
| V51 | Lvqiu          | Ningxia Jufeng Seedling Co., Ltd.                                   | Green       | circular type | Tight  |
| V52 | Ganlan-4       | Lanzhou Tianyuan Seedling Co., Ltd.                                 | Green       | circular type | Medium |
| V53 | Zhenbao        | Shanghai Huihe Seed Industry Co., Ltd.                              | Green       | circular type | Loose  |
| V54 | 9Hao           | Shanxi Qianyousheng Agricultural Technology Co., Ltd.               | Green       | circular type | Tight  |
| V55 | 17gl-2014      | Sichuan Zhongdu Hi-Tech Seed Industry Co., Ltd.                     | Green       | circular type | Tight  |
| V56 | Jiulv55        | Handan Manrun Agricultural Technology Co., Ltd.                     | Green       | circular type | Tight  |
| V57 | Wg-1703        | Shanghai Huihe Seed Industry Co., Ltd.                              | Green       | circular type | Tight  |
| V58 | Fugui          | Henan Yuyi Seed Industry Technology Development Co., Ltd.           | Green       | circular type | Medium |
| V59 | 24Hao          | Shanxi Qianyousheng Agricultural Technology Co., Ltd.               | Green       | circular type | Tight  |
| V60 | Xinshuxinxiu   | Ningxia Jufeng Seedling Co., Ltd.                                   | Green       | circular type | Medium |
| V61 | MR-ZL(K2-25)   | Handan Manrun Agricultural Technology Co., Ltd.                     | Green       | circular type | Tight  |
| V62 | Fuqiang        | Henan Yuyi Seed Industry Technology Development Co., Ltd.           | Green       | circular type | Loose  |
| V63 | Aoli58         | Wuhan Hanyan Seedling Co., Ltd.                                     | Green       | circular type | Tight  |

---

|     |             |                                                   |       |               |        |
|-----|-------------|---------------------------------------------------|-------|---------------|--------|
| V64 | 17gl-3006   | Sichuan Zhongdu Hi-Tech Seed Industry Co., Ltd.   | Green | circular type | Medium |
| V65 | Xueyin5002  | Hubei Xueyin Agricultural Technology Co., Ltd.    | Green | circular type | Tight  |
| V66 | Manyue506   | Beijing Huanai Agricultural Development Co., Ltd. | Green | circular type | Tight  |
| V67 | A0166       | Fujian Minhui Seed Co., Ltd.                      | Green | circular type | Loose  |
| V68 | Jipinyihao  | Xingtai Chenhui Seed Industry Co., Ltd.           | Green | circular type | Tight  |
| V69 | Desaijjiali | Shaanxi Desai Seed Industry Co., Ltd.             | Green | circular type | Tight  |

---
